# Supplementary material
Source: PubMed Central journal article supplement (PMC4596117)
Supplement: supp_3.3.E338_2015-0012-02-at.pdf [file supp_3.3.E338_2015-0012-02-at.pdf]

## Appendix 2 (as supplied by the authors): Search Strategy

| MEDLINE                                                      | Embase                                                       | Cochrane Library                                       |
|--------------------------------------------------------------|--------------------------------------------------------------|--------------------------------------------------------|
| 1. Exp total knee replacement.mp                             | 1. Exp total knee replacement.mp                             | 1. MeSH descriptor: knee prosthesis.mp                 |
| 2. Exp knee prosthesis.mp                                    | 2. Exp knee prosthesis.mp                                    | 2. MeSH descriptor: arthroplasty, replacement, knee.mp |
| 3. Exp knee arthroplasty.mp                                  | 3. Exp knee arthroplasty.mp                                  | 3. knee replacement.mp                                 |
| 4. Exp total hip prosthesis.mp                               | 4. Exp total hip prosthesis.mp                               | 4. knee arthroplasty.mp                                |
| 5. Exp hip arthroplasty.mp                                   | 5. Exp hip arthroplasty.mp                                   | 5. knee prosthesis.mp                                  |
| 6. total knee replacement.mp                                 | 6. total knee replacement.mp                                 | 6. MeSH descriptor: arthroplasty, replacement, hip.mp  |
| 7. total knee arthroplasty.mp                                | 7. total knee arthroplasty.mp                                | 7. MeSH descriptor: hip prosthesis.mp                  |
| 8. total hip replacement.mp                                  | 8. total hip replacement.mp                                  | 8. hip replacement.mp                                  |
| 9. total hip arthroplasty.mp                                 | 9. total hip arthroplasty.mp                                 | 9. hip arthroplasty.mp                                 |
| 10. hip prosthesis.mp                                        | 10. hip prosthesis.mp                                        | 10. hip prosthesis.mp                                  |
| 11. knee prosthesis.mp                                       | 11. knee prosthesis.mp                                       | 11. 1 or 2 or 3 or 4 or 5 or 6 or 7 or 8 or 9 or 10    |
| 12. 1 or 2 or 3 or 4 or 5 or 6 or 7 or 8 or 9 or 10 or 11    | 12. 1 or 2 or 3 or 4 or 5 or 6 or 7 or 8 or 9 or 10 or 11    | 12. MeSH descriptor: antibiotic prophylaxis.mp         |
| 13. Exp antibiotic agent.mp                                  | 13. Exp antibiotic agent.mp                                  | 13. MeSH descriptor: premedication.mp                  |
| 14. Exp prophylaxis.mp                                       | 14. Exp prophylaxis.mp                                       | 14. MeSH descriptor: anti-bacterial agents.mp          |
| 15. antibiotic prophylaxis.mp                                | 15. antibiotic prophylaxis.mp                                | 15. prophylaxis.mp                                     |
| 16. antibiotic prophylactic.mp                               | 16. antibiotic prophylactic.mp                               | 16. antibiotic prophylaxis.mp                          |
| 17. antibacterial agent.mp                                   | 17. antibacterial agent.mp                                   | 17. antibiotic.mp                                      |
| 18. antibacterial agents.mp                                  | 18. antibacterial agents.mp                                  | 18. bacteriocides.mp                                   |
| 19. antimycobacterial agent.mp                               | 19. antimycobacterial agent.mp                               | 19. antimycobacterial agents.mp                        |
| 20. antimycobacterial agents.mp                              | 20. antimycobacterial agents.mp                              | 20. bacteriocidal agents.mp                            |
| 21. Exp antiinfective agent.mp                               | 21. Exp antiinfective agent.mp                               | 21. antibacterial agent.mp                             |
| 22. antiinfective agent.mp                                   | 22. antiinfective agent.mp                                   | 22. anti-bacterial agent.mp                            |
| 23. 13 or 14 or 15 or 16 or 17 or 18 or 19 or 20 or 21 or 22 | 23. 13 or 14 or 15 or 16 or 17 or 18 or 19 or 20 or 21 or 22 | 23. ant-bacterial agent.mp                             |
| 24. Exp infection.mp                                         | 24. Exp infection.mp                                         | 24. MeSH descriptor: anti-infective agents.mp          |
| 25. Exp bacterial infection.mp                               | 25. Exp bacterial infection.mp                               |                                                        |
| 26. bacteria infection.mp                                    | 26. bacteria infection.mp                                    |                                                        |
| 27. bacteria infections.mp                                   | 27. bacteria infections.mp                                   |                                                        |
| 28. bacterial infection.mp                                   | 28. bacterial infection.mp                                   |                                                        |

|                                                                                                        |                                                                                                        |                                                                                                                                                                                                                                                                                                        |
|--------------------------------------------------------------------------------------------------------|--------------------------------------------------------------------------------------------------------|--------------------------------------------------------------------------------------------------------------------------------------------------------------------------------------------------------------------------------------------------------------------------------------------------------|
| <p>29. bacterial infections.mp<br/> 30. 24 or 25 or 26 or 27 or 28 or 29<br/> 31. 12 and 23 and 30</p> | <p>29. bacterial infections.mp<br/> 30. 24 or 25 or 26 or 27 or 28 or 29<br/> 31. 12 and 23 and 30</p> | <p>25. 12 or 13 or 14 or 15 or 16 or 17 or 18<br/> or 19 or 20 or 21 or 22 or 23 or 24<br/> 26. MeSH descriptor: infection.mp<br/> 27. MeSH descriptor: bacterial<br/> infections.mp<br/> 28. infection.mp<br/> 29. bacterial infection.mp<br/> 30. 26 or 27 or 28 or 29<br/> 31. 11 and 25 and 30</p> |
|--------------------------------------------------------------------------------------------------------|--------------------------------------------------------------------------------------------------------|--------------------------------------------------------------------------------------------------------------------------------------------------------------------------------------------------------------------------------------------------------------------------------------------------------|
